# Supplementary material for: Structures and electronic states of nickel-rich oxides for lithium ion batteries
Source: Royal Society of Chemistry journal article supplement (doi:10.1039/d3ma00906h), 2024-01-01
Supplement: d3ma00906h1.pdf [file d3ma00906h1.pdf]

### Supporting Information

**Table. S1.** Calculated magnetic moments of Ni in the 192, 12 and 48 atom unit cells of  $\text{Li}_x\text{NiO}_2$ . The 192 atom cell shows occurrence of all three oxidized Ni cations  $\text{Ni}^{2+}$ ,  $\text{Ni}^{3+}$ ,  $\text{Ni}^{4+}$  in the delithiated structures, while in the 12 and 48 atom unit cells Ni is only  $\text{Ni}^{3+}$ .

| S. No. | 192 atom cell               |                             |                             |                              |                             | 12 atom cell                | 48 atom cell                |
|--------|-----------------------------|-----------------------------|-----------------------------|------------------------------|-----------------------------|-----------------------------|-----------------------------|
|        | $x=0.25$<br>(Chain vacancy) | $x=0.5$<br>(Chain vacancy)  | $x=0.75$<br>(Chain vacancy) | $x=0.75$<br>(Square vacancy) | $x=1$                       | $x=1$                       | $x=1$                       |
|        | Magnetic moment ( $\mu_B$ )  | Magnetic moment ( $\mu_B$ ) | Magnetic moment ( $\mu_B$ ) | Magnetic moment ( $\mu_B$ ) |
| 1-Ni   | -0.0076                     | 0.0736                      | 0.8441                      | -0.0057                      | 0.0643                      | 1.0062                      | 0.9897                      |
| 2-Ni   | 0.0088                      | 0.5042                      | 1.5212                      | 1.5397                       | 1.4592                      | 1.0062                      | 0.9897                      |
| 3-Ni   | -0.0073                     | 0.0494                      | 0.0944                      | -0.0057                      | 0.0643                      | 1.0062                      | 0.9897                      |
| 4-Ni   | -0.0035                     | 0.7671                      | 1.5212                      | 1.5397                       | 1.4592                      |                             | 0.9899                      |
| 5-Ni   | 1.2196                      | 0.7331                      | -0.0101                     | -0.0057                      | 1.4095                      |                             | 0.9892                      |
| 6-Ni   | -0.0073                     | 0.0849                      | -0.0101                     | 0.8443                       | 0.0643                      |                             | 0.9900                      |
| 7-Ni   | 0.2268                      | 0.0494                      | -0.0101                     | -0.0057                      | 0.0643                      |                             | 0.990                       |
| 8-Ni   | -0.0084                     | 0.7962                      | -0.0101                     | 0.8443                       | 1.4095                      |                             | 0.9900                      |
| 9-Ni   | -0.0031                     | 0.0093                      | 0.0944                      | 1.5397                       | 0.0999                      |                             | 0.9897                      |
| 10-Ni  | -0.0080                     | 0.7331                      | 1.5212                      | -0.0057                      | 1.4095                      |                             | 0.9899                      |
| 11-Ni  | -0.0035                     | 0.5042                      | 0.8441                      | 1.5397                       | 1.4592                      |                             | 0.9897                      |

|       |         |        |         |         |        |  |        |
|-------|---------|--------|---------|---------|--------|--|--------|
| 12-Ni | -0.0084 | 0.7757 | 1.5212  | -0.0057 | 1.4095 |  | 0.9897 |
| 13-Ni | -0.0080 | 0.7962 | 0.7998  | 0.8443  | 1.4095 |  |        |
| 14-Ni | 0.9368  | 0.0736 | 0.0213  | -0.0057 | 0.0643 |  |        |
| 15-Ni | -0.0076 | 0.1050 | 0.0213  | 0.8443  | 0.0643 |  |        |
| 16-Ni | 1.2196  | 0.7757 | 0.7998  | -0.0057 | 1.4095 |  |        |
| 17-Ni | 0.0641  | 0.0093 | 0.0944  | -0.0057 | 0.0998 |  |        |
| 18-Ni | -0.0099 | 0.7757 | 1.5212  | 1.5397  | 1.4097 |  |        |
| 19-Ni | 0.7592  | 0.5042 | 0.8441  | -0.0057 | 1.4590 |  |        |
| 20-Ni | -0.0041 | 0.7331 | 1.5212  | 1.5397  | 1.4097 |  |        |
| 21-Ni | -0.0099 | 0.7962 | 0.7999  | 0.8443  | 1.4097 |  |        |
| 22-Ni | 0.0798  | 0.0494 | 0.0213  | -0.0057 | 0.0643 |  |        |
| 23-Ni | -0.0111 | 0.0849 | 0.0213  | 0.8443  | 0.0643 |  |        |
| 24-Ni | 0.7501  | 0.7331 | 0.7999  | -0.0057 | 1.4097 |  |        |
| 25-Ni | -0.0188 | 0.0736 | 0.0944  | 1.5397  | 0.0643 |  |        |
| 26-Ni | 0.7592  | 0.7672 | 1.5212  | -0.0057 | 1.4590 |  |        |
| 27-Ni | -0.0111 | 0.0494 | 0.8440  | 1.5397  | 0.0643 |  |        |
| 28-Ni | 0.1490  | 0.5042 | 1.5212  | -0.0057 | 1.4590 |  |        |
| 29-Ni | 0.0936  | 0.0736 | -0.0101 | -0.0057 | 0.0643 |  |        |
| 30-Ni | -0.0041 | 0.7962 | -0.0101 | 0.8443  | 1.4097 |  |        |

|       |         |         |         |         |        |  |  |
|-------|---------|---------|---------|---------|--------|--|--|
| 31-Ni | 0.7501  | 0.7757  | -0.0101 | -0.0057 | 1.4097 |  |  |
| 32-Ni | -0.0188 | 0.1050  | -0.0101 | 0.8443  | 0.0643 |  |  |
| 33-Ni | -0.0115 | -0.0046 | 0.0944  | -0.0057 | 0.0643 |  |  |
| 34-Ni | 0.7598  | 0.1363  | 1.5212  | -0.0057 | 1.4592 |  |  |
| 35-Ni | -0.0203 | -0.0046 | 0.8441  | -0.0057 | 0.0643 |  |  |
| 36-Ni | 0.1445  | 1.4998  | 1.5212  | -0.0057 | 1.4592 |  |  |
| 37-Ni | 0.0803  | -0.0046 | -0.0101 | 1.5397  | 0.0643 |  |  |
| 38-Ni | -0.0126 | 1.5103  | -0.0101 | 0.8443  | 1.4095 |  |  |
| 39-Ni | 0.7501  | -0.0104 | -0.0101 | 1.5397  | 1.4095 |  |  |
| 40-Ni | -0.0115 | 0.1551  | -0.0101 | 0.8443  | 0.0643 |  |  |
| 41-Ni | 0.7598  | 1.4998  | 0.8441  | -0.0057 | 1.4592 |  |  |
| 42-Ni | -0.0126 | -0.0104 | 1.5212  | -0.0057 | 1.4095 |  |  |
| 43-Ni | 0.0777  | 0.1111  | 0.0944  | -0.0057 | 0.0999 |  |  |
| 44-Ni | -0.0061 | -0.0104 | 1.5212  | -0.0057 | 1.4095 |  |  |
| 45-Ni | -0.0203 | 0.1551  | 0.0213  | 0.8443  | 0.0643 |  |  |
| 46-Ni | 0.7501  | -0.0104 | 0.7998  | 1.5397  | 1.4095 |  |  |
| 47-Ni | -0.0061 | 1.5103  | 0.7998  | 0.8443  | 1.4095 |  |  |
| 48-Ni | 0.1070  | -0.0046 | 0.0213  | 1.5397  | 0.0643 |  |  |

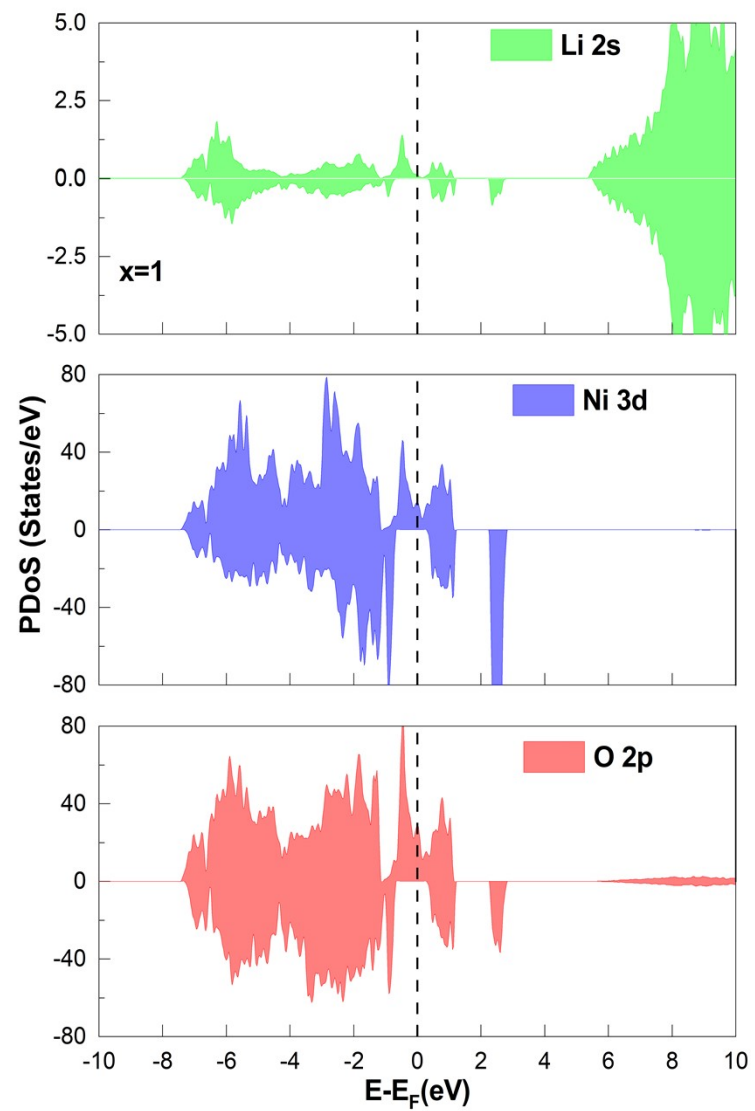

Fig.S1 Partial density of states in  $\text{Li}_x\text{NiO}_2$  at  $x=1$ , with contribution from Li (2s), Ni (3d) and O (2p) atomic orbitals along the Fermi level ( $E_F$ ).

**Table S2.** Position of Lithium vacancies in three A, B, C layers of LNO, where under the heads A, B, C are positions of first Li ion in the layer. The numerals denote the Li is taken away out of the 16 Li ions per layer.

| Configuration     | System                              | A<br>Li1 (0,0,0)             | B<br>Li1 (0.0, -1/√3)         | C<br>Li1 (0.0, 1/√3)         | 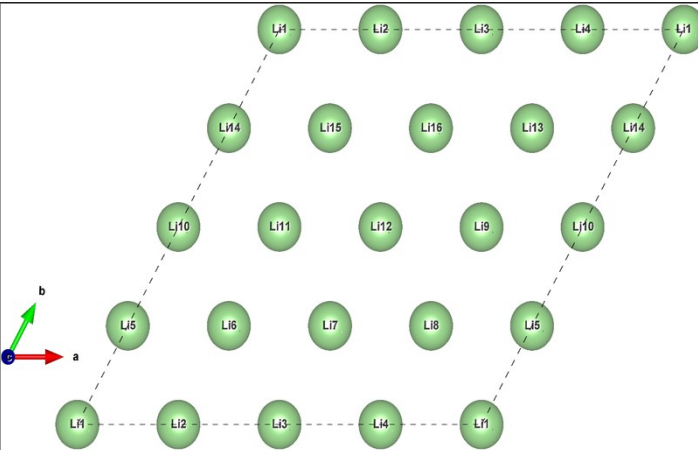 <p>The single plane of Li, where indexing is done to represent the position of Li-vacancy created from that position.</p> |
|-------------------|-------------------------------------|------------------------------|-------------------------------|------------------------------|---------------------------------------------------------------------------------------------------------------------------------------------------------------------------------------------------------------|
| 8c (Most stable)  | Li <sub>0.25</sub> NiO <sub>2</sub> | 2,4,5,6,7,8,9,11,13,14,15,16 | 2,4,5,6,7,8,9,11,13,14,15,16  | 2,4,5,6,7,8,9,11,13,14,15,16 |                                                                                                                                                                                                               |
| 8a (Least stable) | Li <sub>0.25</sub> NiO <sub>2</sub> | 1,2,3,4,5,8,9,10,13,14,15,16 | 1,2,3,4,5,8,9,10,13,14,15,16  | 1,2,3,4,5,8,9,10,13,14,15,16 |                                                                                                                                                                                                               |
| 7c (Most stable)  | Li <sub>0.5</sub> NiO <sub>2</sub>  | 2,4,6,8,9,11,13,15           | 2,4,6,8,9,11,13,15            | 2,4,6,8,9,11,13,15           |                                                                                                                                                                                                               |
| 7a (Least stable) | Li <sub>0.5</sub> NiO <sub>2</sub>  |                              | 1,2,3,5,6,7,10,11,12,14,15,16 | 2,3,4,6,7,8,9,11,12,13,15,16 |                                                                                                                                                                                                               |
| 6c (Most stable)  | Li <sub>0.66</sub> NiO <sub>2</sub> |                              | 2,4,6,8,9,11,13,15            | 1,3,5,7,10,12,14,16          |                                                                                                                                                                                                               |
| 6b (Least stable) | Li <sub>0.66</sub> NiO <sub>2</sub> |                              | 1,2,3,4,5,6,7,8               | 9,10,11,12,13,14,15,16       |                                                                                                                                                                                                               |
| 5a (Most stable)  | Li <sub>0.75</sub> NiO <sub>2</sub> | 9,10,11,12                   | 5,6,7,8                       | 1,2,3,4                      |                                                                                                                                                                                                               |
| 5d (Least stable) | Li <sub>0.75</sub> NiO <sub>2</sub> |                              | 1,2,3,10,11,12                | 1,2,3,10,11,12               |                                                                                                                                                                                                               |

**Table S3.** Optimized values of the structural parameters in fully lithiated and delithiated LiNiO<sub>2</sub>. Single layer structures are listed first, followed by the multilayer structures. The mixing energy is calculated using Equation 1 in the main manuscript.

| Structure    | System                     | Lattice parameters (Å)               |         |         | Mixing Energy (E <sub>Mixing</sub> ) |          |
|--------------|----------------------------|--------------------------------------|---------|---------|--------------------------------------|----------|
|              |                            | a                                    | b       | c       | eV/per atom                          |          |
|              | LiNiO <sub>2</sub> (relax) | 11.5814                              | 11.5814 | 14.2595 |                                      |          |
|              | LiNiO <sub>2</sub>         | 11.5046                              | 11.5046 | 14.0157 |                                      |          |
| Single layer | 1b                         | Li <sub>0.916</sub> NiO <sub>2</sub> | 11.5029 | 11.5029 | 14.0521                              | -0.00038 |
|              | 1c                         | Li <sub>0.916</sub> NiO <sub>2</sub> | 11.4636 | 11.4636 | 14.0396                              | -0.00779 |
|              | 3a                         | Li <sub>0.833</sub> NiO <sub>2</sub> | 11.4722 | 11.4722 | 14.0469                              | -0.00471 |
|              | 3b                         | Li <sub>0.833</sub> NiO <sub>2</sub> | 11.4165 | 11.4165 | 14.0845                              | -0.00315 |
|              | 4a                         | Li <sub>0.75</sub> NiO <sub>2</sub>  | 11.3870 | 11.3870 | 13.9967                              | 0.009521 |
|              | 4b                         | Li <sub>0.75</sub> NiO <sub>2</sub>  | 11.4229 | 11.4229 | 14.0223                              | 0.008959 |

|            |                                 |                                 |          |         |          |          |
|------------|---------------------------------|---------------------------------|----------|---------|----------|----------|
| Multilayer |                                 | $\text{Li}_{0.916}\text{NiO}_2$ | 11.4761  | 11.4761 | 14.0542  | -0.00775 |
|            |                                 | $\text{Li}_{0.916}\text{NiO}_2$ | 11.4843  | 11.4686 | 14.0552  | -0.00753 |
|            |                                 | $\text{Li}_{0.833}\text{NiO}_2$ | 11.4776  | 11.4776 | 14.0991  | -0.00728 |
|            |                                 | $\text{Li}_{0.833}\text{NiO}_2$ | 11.4788  | 11.4655 | 14.0693  | -0.01083 |
|            | 5a                              | $\text{Li}_{0.75}\text{NiO}_2$  | 11.4254  | 11.4467 | 14.0831  | -0.01968 |
|            | 5d                              | $\text{Li}_{0.75}\text{NiO}_2$  | 11.3983  | 11.4496 | 14.0801  | -0.00925 |
|            | 6b                              | $\text{Li}_{0.667}\text{NiO}_2$ | 11.4096  | 11.3779 | 14.1016  | 0.005455 |
|            | 6c                              | $\text{Li}_{0.667}\text{NiO}_2$ | 11.4042  | 11.4042 | 14.0953  | -0.00946 |
|            |                                 | $\text{Li}_{0.58}\text{NiO}_2$  | 11.3866  | 11.3866 | 14.1506  | -0.00854 |
|            |                                 | $\text{Li}_{0.58}\text{NiO}_2$  | 11.3793  | 11.3793 | 14.1387  | -0.01525 |
|            | 7a                              | $\text{Li}_{0.5}\text{NiO}_2$   | 11.3459  | 11.3985 | 13.9743  | 0.009452 |
|            | 7c                              | $\text{Li}_{0.5}\text{NiO}_2$   | 11.3304  | 11.3779 | 14.1370  | -0.01667 |
|            |                                 | $\text{Li}_{0.41}\text{NiO}_2$  | 11.3186  | 11.3335 | 14.1609  | -0.01619 |
|            |                                 | $\text{Li}_{0.41}\text{NiO}_2$  | 11.3454  | 11.2758 | 14.1639  | -0.01339 |
|            |                                 | $\text{Li}_{0.33}\text{NiO}_2$  | 11.3843  | 11.2706 | 14.0401  | -0.0017  |
|            |                                 | $\text{Li}_{0.33}\text{NiO}_2$  | 11.2809  | 11.3240 | 14.1175  | -0.00947 |
|            | 8a                              | $\text{Li}_{0.25}\text{NiO}_2$  | 11.2873  | 11.2873 | 13.9924  | 0.000836 |
|            | 8c                              | $\text{Li}_{0.25}\text{NiO}_2$  | 11.2965  | 11.2965 | 14.1184  | -0.01572 |
|            |                                 | $\text{Li}_{0.167}\text{NiO}_2$ | 11.2666  | 11.2666 | 13.9581  | 0.001363 |
|            |                                 | $\text{Li}_{0.167}\text{NiO}_2$ | 11.2846  | 11.2520 | 14.0254  | -0.01025 |
|            | $\text{Li}_{0.083}\text{NiO}_2$ | 11.2538                         | 11.2538  | 13.8524 | 0.001689 |          |
|            | $\text{Li}_{0.083}\text{NiO}_2$ | 11.2687                         | 11.2275; | 13.9108 | -0.00339 |          |
|            |                                 | 12 Atom LNO                     | 2.8953   | 2.8953  | 14.2595  |          |
|            |                                 | 48 Atom LNO                     | 5.7366   | 5.7366  | 14.0592  |          |
|            |                                 | $\text{NiO}_2$                  | 11.2308  | 11.2308 | 13.7727  |          |
|            |                                 | Li                              | 3.4274   | 3.4274  | 3.4274   |          |

**Table. S4.** Calculated magnetic moments of Ni, Mn in  $\text{Li}_x\text{Ni}_y\text{Mn}_{1-y}\text{O}_2$ .

| S. No. | $\text{Li}_x\text{Ni}_{0.875}\text{Mn}_{0.125}\text{O}_2$ |         |         |         | S. No. | $\text{Li}_x\text{Ni}_{0.75}\text{Mn}_{0.25}\text{O}_2$ |         |         |                |                 | S. No. | $\text{Li}_x\text{Ni}_{0.625}\text{Mn}_{0.375}\text{O}_2$ |         |         |         |
|--------|-----------------------------------------------------------|---------|---------|---------|--------|---------------------------------------------------------|---------|---------|----------------|-----------------|--------|-----------------------------------------------------------|---------|---------|---------|
|        | x=1                                                       | x=0.25  | x=0.5   | x=0.75  |        | x=1                                                     | x=0.25  | x=0.5   | x=0.75 (chain) | x=0.75 (square) |        | x=1                                                       | x=0.25  | x=0.5   | x=0.75  |
|        | $\mu_B$                                                   | $\mu_B$ | $\mu_B$ | $\mu_B$ |        | $\mu_B$                                                 | $\mu_B$ | $\mu_B$ | $\mu_B$        | $\mu_B$         |        | $\mu_B$                                                   | $\mu_B$ | $\mu_B$ | $\mu_B$ |
| 1-Ni   | 1.5402                                                    | 0.0292  | 0.8388  | 1.5     | 1-Mn   | 2.6847                                                  | 2.6098  | 2.6397  | 2.6456         | 2.6685          | 1-Mn   | 2.6571                                                    | 2.6303  | 2.6457  | 2.6464  |
| 2-Ni   | 0.0575                                                    | 0.0049  | -0.0113 | 0.0859  | 2-Ni   | 0.8597                                                  | 0.0107  | 0.0503  | 0.8846         | 1.5515          | 2-Ni   | 1.5321                                                    | 0.0525  | 0.8631  | 1.5268  |
| 3-Ni   | 1.5356                                                    | 0.0122  | 0.1328  | 1.5189  | 3-Mn   | 2.6847                                                  | 2.6254  | 2.6441  | 2.6456         | 2.6685          | 3-Mn   | 2.6562                                                    | 2.6300  | 2.6448  | 2.6470  |
| 4-Mn   | 2.6663                                                    | 2.6517  | 2.6502  | 2.6619  | 4-Ni   | 0.8597                                                  | 0.0102  | 0.0524  | 0.8846         | 1.5515          | 4-Ni   | 1.5351                                                    | 0.0566  | 0.8227  | 1.5274  |
| 5-Ni   | 1.5294                                                    | 0.8478  | 0.8021  | 0.0161  | 5-Ni   | 0.8597                                                  | -0.8584 | -0.7705 | -0.8164        | 0.0294          | 5-Mn   | 2.6812                                                    | 2.7047  | 2.6765  | 2.6668  |
| 6-Ni   | 0.8204                                                    | -0.0076 | 0.7673  | 0.7597  | 6-Ni   | 1.5582                                                  | 0.0115  | -0.7911 | -0.8347        | 0.8754          | 6-Ni   | 1.5539                                                    | 0.0964  | 1.4637  | 0.8389  |
| 7-Ni   | 0.8736                                                    | 0.8932  | 0.7985  | 0.0294  | 7-Ni   | 0.8597                                                  | -0.8482 | -0.7731 | -0.8164        | 0.0294          | 7-Mn   | 2.6847                                                    | 2.7058  | 2.6745  | 2.6666  |
| 8-Mn   | 2.6656                                                    | 2.6502  | 2.6751  | 2.6304  | 8-Ni   | 1.5582                                                  | -0.0034 | -0.7916 | -0.8346        | 0.8754          | 8-Ni   | 1.5549                                                    | 0.0958  | 0.9244  | 0.8390  |
| 9-Ni   | 1.5268                                                    | 0.0180  | 0.0122  | 1.5182  | 9-Ni   | 0.8597                                                  | -0.0353 | 0.0503  | 0.8779         | 1.5515          | 9-Ni   | 0.9380                                                    | 0.0553  | 0.2465  | 0.9477  |
| 10-Ni  | 0.0616                                                    | -0.0078 | 0.0504  | 0.1557  | 10-Mn  | 2.6847                                                  | -2.6273 | 2.6441  | 2.6426         | 2.6685          | 10-Mn  | 2.6485                                                    | 2.6282  | 2.6352  | 2.6409  |
| 11-Ni  | 0.8558                                                    | -0.0005 | -0.0184 | 0.8499  | 11-Ni  | 0.8597                                                  | -0.0469 | 0.0524  | 0.8779         | 1.5515          | 11-Ni  | 0.9400                                                    | 0.0594  | 0.8909  | 0.9471  |
| 12-Ni  | 1.5393                                                    | 0.0137  | 1.4682  | 1.5226  | 12-Mn  | 2.6847                                                  | -2.6285 | 2.6397  | 2.6426         | 2.6685          | 12-Mn  | 2.6505                                                    | 2.6284  | 2.6419  | 2.6398  |
| 13-Ni  | 1.5286                                                    | 0.0179  | 0.7892  | 0.8243  | 13-Ni  | 1.5582                                                  | 0.0120  | -0.7912 | 1.3860         | 0.8754          | 13-Ni  | 0.8890                                                    | 0.0332  | 0.1150  | 0.8379  |
| 14-Ni  | 0.8696                                                    | 0.8632  | 0.7873  | 0.8134  | 14-Ni  | 0.8597                                                  | -0.8527 | -0.7731 | -0.0301        | 0.0294          | 14-Ni  | 1.5422                                                    | 1.5516  | 0.8287  | 0.8223  |
| 15-Ni  | 0.0947                                                    | -0.0063 | 0.0255  | 0.0503  | 15-Ni  | 1.5582                                                  | 0.0012  | -0.7915 | 1.3856         | 0.8754          | 15-Ni  | 0.9055                                                    | 0.0332  | 0.1296  | 0.8375  |

|       |        |         |         |         |       |        |         |         |         |        |       |        |        |        |        |
|-------|--------|---------|---------|---------|-------|--------|---------|---------|---------|--------|-------|--------|--------|--------|--------|
| 16-Ni | 0.0260 | 0.8385  | 0.0908  | 0.0239  | 16-Ni | 0.8597 | -0.8567 | -0.7705 | -0.0301 | 0.0294 | 16-Ni | 1.5435 | 1.5516 | 0.8428 | 0.8217 |
| 17-Ni | 0.8204 | 0.0515  | 0.7673  | 0.8280  | 17-Ni | 0.8597 | -0.0094 | 0.0592  | 0.8276  | 0.0294 | 17-Ni | 0.9026 | 0.8345 | 0.1221 | 0.8883 |
| 18-Ni | 0.0616 | -0.0236 | 0.0504  | 0.0981  | 18-Ni | 0.8597 | 0.0092  | -0.7977 | 0.8445  | 1.5514 | 18-Ni | 1.5443 | 0.0331 | 0.8226 | 1.5477 |
| 19-Ni | 1.5286 | 0.7791  | 0.7892  | 1.5350  | 19-Ni | 0.8597 | -0.8092 | 0.0560  | 0.8276  | 0.0294 | 19-Ni | 0.8879 | 0.8330 | 0.1171 | 0.8860 |
| 20-Ni | 1.5356 | 0.0068  | 0.1328  | 0.8599  | 20-Ni | 0.8597 | -0.0048 | -0.7943 | 0.8455  | 1.5514 | 20-Ni | 1.5470 | 0.0345 | 0.8368 | 1.5469 |
| 21-Ni | 0.8558 | -0.0055 | -0.0184 | 0.7812  | 21-Ni | 1.5582 | 0.0822  | -0.8085 | 0.8455  | 0.8754 | 21-Ni | 0.9446 | 0.0618 | 0.8977 | 0.8553 |
| 22-Ni | 0.8696 | 0.8131  | 0.7873  | 0.8188  | 22-Mn | 2.6848 | 2.6420  | 2.6285  | 2.6035  | 2.6688 | 22-Mn | 2.6484 | 2.6593 | 2.6364 | 2.6225 |
| 23-Mn | 2.6663 | 2.6479  | 2.6502  | 2.6218  | 23-Ni | 1.5581 | 0.0732  | -0.8031 | 0.8455  | 0.8754 | 23-Ni | 0.9362 | 0.0619 | 0.2636 | 0.8537 |
| 24-Ni | 0.8737 | 0.8278  | 0.7985  | 0.8324  | 24-Mn | 2.6848 | 2.6324  | 2.6282  | 2.6035  | 2.6688 | 24-Mn | 2.6521 | 2.6565 | 2.6426 | 2.6227 |
| 25-Ni | 1.5393 | 0.0181  | 1.4683  | 1.5329  | 25-Ni | 0.8597 | 0.0117  | -0.7977 | 0.8358  | 1.5514 | 25-Mn | 2.6838 | 2.6505 | 2.6766 | 2.6757 |
| 26-Ni | 0.0947 | 0.0078  | 0.0255  | 0.0664  | 26-Ni | 0.8597 | -0.7980 | 0.0561  | 0.8291  | 0.0294 | 26-Ni | 1.5526 | 0.8965 | 1.4591 | 1.5488 |
| 27-Ni | 1.5403 | 0.0360  | 0.8387  | 1.5286  | 27-Ni | 0.8597 | 0.0099  | -0.7943 | 0.8358  | 1.5514 | 27-Mn | 2.6811 | 2.6484 | 2.6747 | 2.6746 |
| 28-Mn | 2.6656 | 2.6787  | 2.6750  | 2.6515  | 28-Ni | 0.8597 | -0.8249 | 0.0592  | 0.8291  | 0.0294 | 28-Ni | 1.5518 | 0.8501 | 0.9324 | 1.5468 |
| 29-Ni | 0.0260 | 0.1290  | 0.0908  | -0.0002 | 29-Mn | 2.6848 | -2.6461 | 2.6282  | 2.6083  | 2.6688 | 29-Mn | 2.6566 | 2.6565 | 2.6422 | 2.6372 |
| 30-Ni | 0.0575 | 0.0008  | -0.0113 | 0.0057  | 30-Ni | 1.5581 | 0.7140  | -0.8034 | -0.8414 | 0.8754 | 30-Ni | 1.5357 | 0.0548 | 0.8631 | 0.0605 |
| 31-Ni | 1.5294 | 0.7944  | 0.8021  | 0.7898  | 31-Mn | 2.6848 | -2.6340 | 2.6282  | 2.6083  | 2.6688 | 31-Mn | 2.6557 | 2.6565 | 2.6460 | 2.6352 |
| 32-Ni | 1.5268 | -0.0075 | 0.0122  | -0.0026 | 32-Ni | 1.5581 | -0.0071 | -0.8084 | -0.8414 | 0.8754 | 32-Ni | 1.5364 | 0.0547 | 0.8328 | 0.0591 |
| 33-Ni | 0.8919 | -0.007  | -0.0033 | -0.8477 | 33-Ni | 0.8597 | 0.0503  | -0.0432 | 0.8703  | 0.0294 | 33-Ni | 0.9072 | 0.0256 | 0.0262 | 0.8678 |
| 34-Ni | 0.8645 | 0.7923  | 0.8672  | 0.8625  | 34-Mn | 2.6847 | 2.6362  | 2.6449  | 2.6364  | 2.6687 | 34-Ni | 0.9675 | 0.1009 | 1.5769 | 0.9231 |
| 35-Ni | 1.5373 | -0.0080 | 0.0203  | 1.5343  | 35-Ni | 0.8597 | 0.0492  | -0.7756 | 0.8703  | 0.0294 | 35-Ni | 0.8817 | 0.0379 | 0.0612 | 0.8594 |
| 36-Ni | 0.0493 | 0.1222  | 0.8408  | 0.0669  | 36-Mn | 2.6847 | 2.6340  | 2.6456  | 2.6364  | 2.6687 | 36-Ni | 1.5307 | 0.7955 | 1.5722 | 1.5307 |
| 37-Ni | 0.0438 | 0.0586  | -0.0025 | 0.0192  | 37-Ni | 0.8597 | -0.7939 | 0.0207  | -0.7906 | 1.5514 | 37-Ni | 1.5430 | 0.8739 | 0.8358 | 0.8017 |



|       |        |         |         |         |       |        |         |         |         |        |       |        |        |        |        |
|-------|--------|---------|---------|---------|-------|--------|---------|---------|---------|--------|-------|--------|--------|--------|--------|
| 38-Ni | 0.0493 | -0.0248 | 0.8408  | -0.0062 | 38-Ni | 1.5582 | 0.0422  | 0.8891  | -0.8266 | 0.8754 | 38-Mn | 2.6464 | 2.6299 | 2.6543 | 2.6437 |
| 39-Ni | 1.5295 | 0.7910  | 0.0143  | 0.7773  | 39-Ni | 0.8597 | -0.7953 | 0.0205  | -0.7906 | 1.5514 | 39-Ni | 0.9306 | 0.1967 | 0.0560 | 0.0577 |
| 40-Ni | 1.5223 | 0.0074  | 0.8410  | 0.0335  | 40-Ni | 1.5582 | 0.0413  | 1.4818  | -0.8266 | 0.8754 | 40-Mn | 2.6560 | 2.6171 | 2.6517 | 2.6432 |
| 41-Ni | 1.5337 | 0.8252  | 0.8609  | 1.5327  | 41-Mn | 2.6847 | 2.6352  | 2.6449  | 2.6377  | 2.6687 | 41-Mn | 2.6856 | 2.6776 | 2.7305 | 2.6727 |
| 42-Ni | 0.8919 | -0.0043 | -0.0033 | -0.7951 | 42-Ni | 0.8597 | 0.0516  | -0.7756 | 0.8804  | 0.0294 | 42-Ni | 1.5550 | 0.0867 | 0.8454 | 1.5442 |
| 43-Ni | 1.5223 | 0.8167  | 0.8410  | 1.5147  | 43-Mn | 2.6847 | 2.6327  | 2.6456  | 2.6377  | 2.6687 | 43-Mn | 2.6887 | 2.6725 | 2.7187 | 2.6875 |
| 44-Mn | 2.6627 | 2.6431  | 2.6615  | 2.6426  | 44-Ni | 0.8597 | 0.0516  | -0.0432 | 0.8804  | 0.0294 | 44-Ni | 1.5543 | 0.0816 | 0.8942 | 1.5472 |
| 45-Ni | 0.8645 | 0.0182  | 0.8672  | 0.8375  | 45-Ni | 1.5582 | 0.0466  | 0.8890  | 0.8531  | 0.8754 | 45-Mn | 2.6566 | 2.6376 | 2.6981 | 2.6194 |
| 46-Ni | 0.0438 | 0.0203  | -0.0025 | 0.0498  | 46-Ni | 0.8597 | -0.7938 | 0.0205  | -0.8159 | 1.5514 | 46-Ni | 1.5377 | 0.8305 | 0.2059 | 0.8878 |
| 47-Ni | 1.5338 | 0.0368  | 0.8609  | 0.8530  | 47-Ni | 1.5582 | 0.0510  | 1.4821  | 0.8531  | 0.8754 | 47-Mn | 2.6567 | 2.6438 | 2.6775 | 2.6189 |
| 48-Mn | 2.6684 | 2.6787  | 2.6578  | 2.6193  | 48-Ni | 0.8597 | -0.7952 | 0.0207  | -0.8159 | 1.5514 | 48-Ni | 1.5430 | 0.8357 | 0.0614 | 0.8841 |
